# Supplementary material for: Activation of RAF1 (c-RAF) by the Marine Alkaloid Lasonolide A Induces Rapid Premature Chromosome Condensation
Source: Mar Drugs. 2015 Jun 5;13(6):3625–39. doi: 10.3390/md13063625 (PMC4483648; doi:10.3390/md13063625)
Supplement: Supplementary File 1 [file marinedrugs-13-03625-s001.pdf]

# Supplementary Information

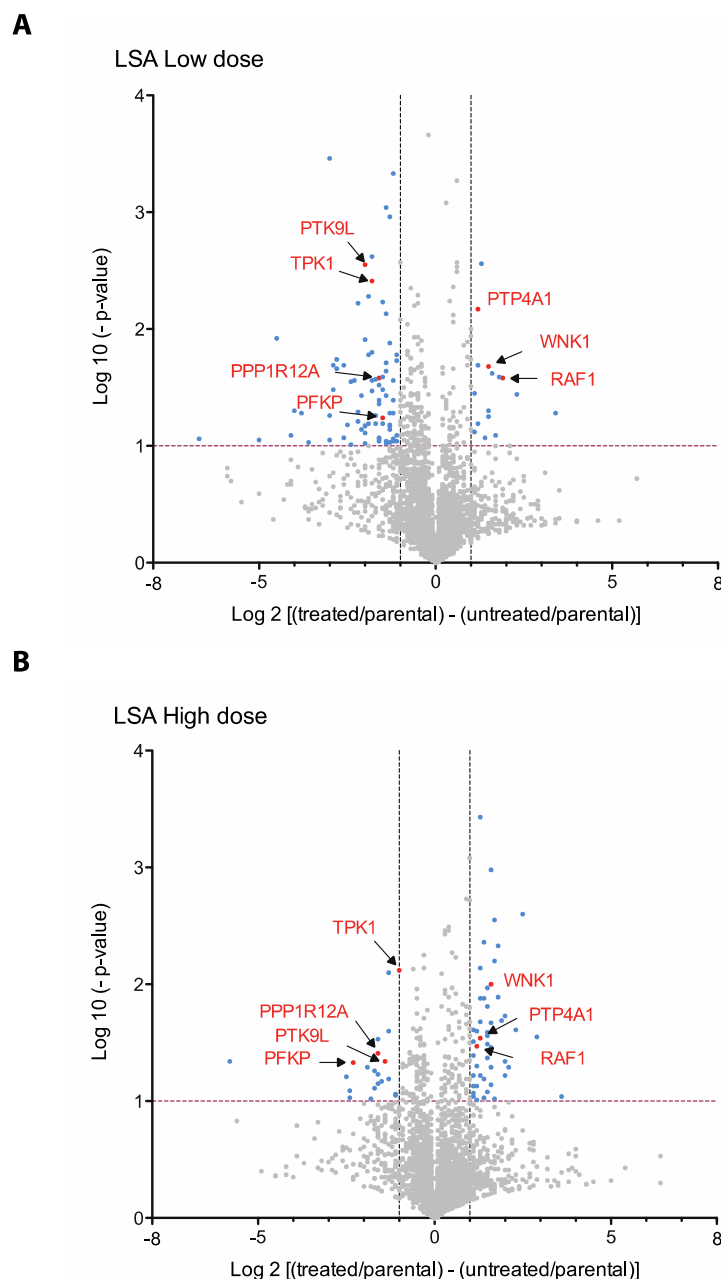

**Figure S1. LSA synthetic lethal candidates.** Volcano plot illustrating normalized shRNA fold changes (log base 2) and  $p$ -values ( $-\log$  base 10) after cells were cultured in low, 10 nM (**A**) or high, 100 nM (**B**) LSA. Horizontal bar at  $y = 1$  represents a significance level of  $p = 0.1$  which we set as a relaxed cut-off. Vertical bars represents genes with a  $\log 2 > 1$  or  $< -1$ , *i.e.*,  $FC > 2$  or  $< -2$ . Significantly modulated shRNAs by either LSA concentrations are colored in blue and commonly modulated shRNA by both LSA concentrations are colored in red.
